# Supplementary material for: Structure of choline chloride-carboxylic acid deep eutectic solvents by wide-angle X-ray scattering and DFT calculations
Source: Royal Society of Chemistry journal article supplement (doi:10.1039/d3cp00570d), 2023-01-01
Supplement: d3cp00570d1.pdf [file d3cp00570d1.pdf]

**Supporting Information for:**

**Structure of Choline Chloride-Carboxylic Acid Deep Eutectic Solvents  
by Wide-Angle X-ray Scattering and DFT Calculations**

Keke Chai<sup>a, c</sup>, Yongquan Zhou<sup>\*a, c</sup>, Xingmei Lu<sup>b, c</sup>, Toshio Yamaguchi<sup>a</sup>, Koji Ohara<sup>d</sup>, Hongyan Liu<sup>a</sup>,  
Fayan Zhu<sup>a</sup>

<sup>a</sup>Key Laboratory of Comprehensive and Highly Efficient Utilization of Salt Lake Resources; Key Laboratory of Salt Lake Resources Chemistry of Qinghai Province; Qinghai Institute of Salt Lakes, Chinese Academy of Sciences, Xining, Qinghai 810008, China

<sup>b</sup>Beijing Key Laboratory of Ionic Liquids Clean Process, CAS Key Laboratory of Green Process and Engineering, Institute of Process Engineering, Chinese Academy of Sciences, 100190 Beijing, China.

<sup>c</sup>Innovation Academy for Green Manufacture, Chinese Academy of Sciences, 100190 Beijing, China.

<sup>d</sup>Diffraction and Scattering Division, Japan Synchrotron Radiation Research Institute, 1-1-1 Kouto, Sayo, Hyogo 679-5198, Japan.

<sup>e</sup>University of Chinese Academy of Sciences, Beijing 100049, China.

\*All correspondence should be sent to: Prof. Yongquan Zhou, E-mail: yongqzhou@163.com.

### **The detailed information of reference 38:**

Frisch, M. J.; Trucks, G. W.; Schlegel, H. B.; Scuseria, G. E.; Robb, M. A.; Cheeseman, J. R.; Scalmani, G.; Barone, V.; Petersson, G. A.; Nakatsuji, H.; Li, X.; Caricato, M.; Marenich, A. V.; Bloino, J.; Janesko, B. G.; Gomperts, R.; Mennucci, B.; Hratchian, H. P.; Ortiz, J. V.; Izmaylov, A. F.; Sonnenberg, J. L.; Williams; Ding, F.; Lipparini, F.; Egidi, F.; Goings, J.; Peng, B.; Petrone, A.; Henderson, T.; Ranasinghe, D.; Zakrzewski, V. G.; Gao, J.; Rega, N.; Zheng, G.; Liang, W.; Hada, M.; Ehara, M.; Toyota, K.; Fukuda, R.; Hasegawa, J.; Ishida, M.; Nakajima, T.; Honda, Y.; Kitao, O.; Nakai, H.; Vreven, T.; Throssell, K.; Montgomery Jr., J. A.; Peralta, J. E.; Ogliaro, F.; Bearpark, M. J.; Heyd, J. J.; Brothers, E. N.; Kudin, K. N.; Staroverov, V. N.; Keith, T. A.; Kobayashi, R.; Normand, J.; Raghavachari, K.; Rendell, A. P.; Burant, J. C.; Iyengar, S. S.; Tomasi, J.; Cossi, M.; Millam, J. M.; Klene, M.; Adamo, C.; Cammi, R.; Ochterski, J. W.; Martin, R. L.; Morokuma, K.; Farkas, O.; Foresman, J. B.; Fox, D. J. Gaussian 16 Rev. A.03, Wallingford, CT, 2016.

### **Wide-angle X-ray scattering data treatments**

The experimental scattering intensities of sample solutions and an empty capillary were corrected for absorption. Then, the scattering intensities of sample solutions were obtained by subtracting the corrected intensity of the empty capillary. After absorption correction and empty capillary subtraction, the scattering intensities were normalized to electron units by comparing the asymptote of the scattering intensities with the calculated coherent intensities and incoherent intensities at large scattering vector ( $Q > 15 \text{ \AA}^{-1}$ ). The normalization factor was re-checked by Krogh-Moe and Norman integration methods.<sup>1,2</sup> The normalization factors by the two methods agreed with each other within

2%. The structural function  $I^{coh}(Q)$  of each solution was calculated by subtracting the independent scatterings, which is the sum of incoherent and coherent scattering of all atoms in the solution from the normalized intensity as Eq. (S1)

$$I^{coh}(Q) = KI_p(Q) - \sum_{i=1}^{N_{atom}} x_i [f_i^2(Q) + (\Delta f_i'')^2 + I_i^{incoh}(Q)] \quad (S1)$$

The  $Q$ -weighted structure function  $Q \cdot I(Q)$  was Fourier-transformed to the radial distribution function (RDF) by Eq. (S2)

$$G(r) = 4\pi r^2 \rho_0 + \frac{2r}{\pi} \int_0^{Q_{max}} Q \cdot I(Q) \cdot M(Q) \cdot \frac{\sin(Qr)}{Qr} dQ \quad (S2)$$

where  $r$  is radial distance.  $\rho_0$  stands for the average electron number density of the sample

solutions (  $\rho_0 = \left[ \sum_{i=1}^{N_{atom}} n_i f_i(0) \right]^2 / V$  ), *i.e.*, average electron scattering ability when the scattering angle of the sample is 0 ( $e^2 \cdot \text{\AA}^{-3}$ ).  $f_i(0)$ , atomic scattering factor of the  $i$ -th atom with  $Q = 0$ .  $Q_{max}$  is the upper limit of  $Q$  available in the experiments. The modification function  $M(Q)$  is defined as Eq. (S3)

$$M(Q) = \left\{ \sum_{i=1}^{N_{atom}} n_i [f_i^2(0) + (\Delta f_i'')^2] / \sum_{i=1}^{N_{atom}} n_i [f_i^2(Q) + (\Delta f_i'')^2] \right\} \cdot \exp(-k \cdot Q^2) \quad (S3)$$

here, the  $k$  (damping factor) is  $0.01 \text{\AA}^2$  to reduce the influence of experimental error and integral truncation error, and is also to suppress the sharpening effect caused by the first term. The spurious peaks are removed by peak shape calculation and second Fourier transform. By calculating the theoretical peak of the intramolecular interactions within a water molecule and performing Fourier inverse transformation in the usual manner,<sup>3</sup> the spurious ripples below  $1 \text{\AA}^{-1}$  were removed from RDF.

All corrections and treatments of scattering data were performed with the KURVLR program.<sup>4</sup>

EPSR adopts Monte Carlo to make the theoretical structure factor close to that of the experiment by randomly moving atomic positions. The experimental total normalized structure factor used in EPSR is defined as Eq. (S4)

$$F^{exp}(Q) = \frac{[I^{coh}(Q) - \sum n_i f_i^2(Q)]}{[\sum n_i f_i^2(Q)]} \quad (S4)$$

The theoretical  $F^{sim}(Q)$  is calculated by Eq. (S5) and compared with the experimental  $F^{exp}(Q)$ .

$$F^{sim}(Q) = \sum_i \sum_{j \geq i} (2 - \delta_{ij}) c_j f_i(Q) f_j(Q) \cdot [A_{ij}(Q) - 1] / [\sum c_i f_i^2(Q)] \quad (S5)$$

$$A_{ij}(Q) - 1 = 4\pi\rho \int_0^\infty r^2 (g_{ij}(r) - 1) \frac{\sin Qr}{Qr} dr \quad (S6)$$

here,  $c_i$  and  $c_j$  are the atomic fractions of atom types  $i$  and  $j$ ,  $f_i(Q)$  and  $f_j(Q)$  are the  $Q$  dependent atomic scattering factors of atom types  $i$  and  $j$ ,  $\delta_{ij}$  is the Kronecker function to avoid double counting pairs of atoms of the same type,  $A_{ij}(Q)$  is the Faber-Ziman partial structure factor,  $g_{ij}(r)$  is the pair distribution functions of all atoms existing in the sample.

The total radial distribution functions,  $G(r)$ , is calculated as Eq. (S7)

$$G(r) = \sum_i \sum_{j \geq i} (2 - \delta_{ij}) c_j f_i(Q) f_j(Q) (g_{ij}(r) - 1) \quad (S7)$$

The initial structure of EPSR simulation is generated by putting an appropriate number of ions and molecules into a box to obtain the required density. The potential energy of the simulation box is calculated as Eq. (S8) and (S9)

$$U_{tot} = U_{intra} + \sum_i \left( 4\varepsilon_{ij} \left[ \left( \frac{\sigma_{ij}}{r_{ij}} \right)^{12} - \left( \frac{\sigma_{ij}}{r_{ij}} \right)^6 \right] + \frac{q_i q_j}{4\pi\varepsilon_0 r_{ij}} \right) + U_{EP} \quad (S8)$$

$$\varepsilon_{ij} = (\varepsilon_i \varepsilon_j)^{\frac{1}{2}}, \quad \sigma_{ij} = \frac{1}{2}(\sigma_i + \sigma_j) \quad (S9)$$

here,  $U_{intra}$  is described by using a series of harmonic potentials,  $\varepsilon_{ij}$  and  $\sigma_{ij}$  are the Lennard-Jones parameters for the potential well depth and effective atom size, respectively.  $\varepsilon_0$  is the vacuum

permittivity,  $r_{ij}$  is the interatomic spacing,  $q_i$  is the atomic charge,  $U_{EP}$  is the empirical potential generated by EPSR,<sup>5-7</sup> which is purely obtained by fitting the simulation results with the experimental scattering data. This empirical potential term can make the simulated structure factor as close to the experimental scattering data as possible without violating the atomic overlap, van der Waals force and hydrogen bond.

**Table S1.** EPSR simulation setup details.

| No.  | Ch <sup>+</sup> | Cl <sup>-</sup> | FA/A<br>A | Density/ atoms Å <sup>-3</sup> | Box side Length/ Å | Iterations<br>times |
|------|-----------------|-----------------|-----------|--------------------------------|--------------------|---------------------|
| ChFA | 250             | 250             | 500       | 0.09604                        | 43.6730            | 20000               |
| ChAA | 250             | 250             | 500       | 0.09721                        | 46.0615            | 20000               |

**Table S2.** Potential parameter values for EPSR modelling<sup>8-10</sup> (the charge of FA/AA are RESP charge)

| atom type | $\epsilon$ /kJ • mol <sup>-1</sup> | $\sigma$ /Å | Mass/amu | $q/e$     |
|-----------|------------------------------------|-------------|----------|-----------|
| N         | 0.7000                             | 3.200       | 14.0067  | -0.604000 |
| CMT       | 0.8000                             | 3.700       | 12.0111  | -0.349000 |
| C2N       | 0.8000                             | 3.700       | 12.0111  | -0.099000 |
| HMT       | 0.2000                             | 2.580       | 1.00800  | 0.250000  |
| HCN       | 0.2000                             | 2.580       | 1.00800  | 0.250000  |
| COH       | 0.8000                             | 3.700       | 12.0111  | 0.050000  |
| HCO       | 0.2000                             | 2.580       | 1.00800  | 0.090000  |
| OH        | 0.6500                             | 3.100       | 15.9994  | -0.650000 |
| HOH       | 0.0000                             | 0.000       | 1.00800  | 0.420000  |
| Cl        | 0.5660                             | 4.191       | 35.4529  | -1.00000  |
| CF        | 0.4393                             | 3.750       | 12.0111  | 0.586502  |
| HF        | 0.2000                             | 2.580       | 1.00800  | 0.061180  |
| OCF       | 0.6500                             | 3.100       | 15.9994  | -0.514882 |
| OF        | 0.6500                             | 3.100       | 15.9994  | -0.571063 |
| HOF       | 0.0000                             | 0.000       | 1.00800  | 0.438263  |
| CTA       | 0.7000                             | 3.200       | 12.0111  | -0.433884 |
| HMA       | 0.2000                             | 2.580       | 1.00800  | 0.092500  |
| HCA       | 0.2000                             | 2.580       | 1.00800  | 0.163178  |
| COA       | 0.4393                             | 3.750       | 12.0111  | 0.758027  |

|     |        |       |         |           |
|-----|--------|-------|---------|-----------|
| OCA | 0.6500 | 3.100 | 15.9994 | -0.560468 |
| OA  | 0.6500 | 3.100 | 15.9994 | -0.597951 |
| HOA | 0.0000 | 0.000 | 1.00800 | 0.415393  |

## DFT calculations

**Table S3.** The structural and energy parameters of ChFA and ChAA

|                                         | ChFA-GA | ChFA-GB | ChFA-TA |                                         | ChAA-GA | ChAA-GB | ChAA-TA |
|-----------------------------------------|---------|---------|---------|-----------------------------------------|---------|---------|---------|
| N $\cdots$ Cl                           | 4.03 Å  | 4.42 Å  | 3.74 Å  | N $\cdots$ Cl                           | 4.07 Å  | 4.01 Å  | 3.77 Å  |
| HMT $\cdots$ Cl                         | 2.59 Å  | 2.95 Å  | 2.53 Å  | HMT $\cdots$ Cl                         | 3.01 Å  | 2.58 Å  | 2.60 Å  |
| HOH $\cdots$ Cl                         | 2.25 Å  | 4.25 Å  | -       | HOH $\cdots$ Cl                         | 4.90 Å  | 2.24 Å  | -       |
| HMT $\cdots$ OCF                        | 2.77 Å  | 2.64 Å  | 2.65 Å  | HMT $\cdots$ OCA                        | 2.60 Å  | 2.50 Å  | 2.56 Å  |
| HCN $\cdots$ OCF                        | 3.79 Å  | 2.31 Å  | 2.30 Å  | HOH $\cdots$ OCA                        | 1.80 Å  | 4.11 Å  | 2.06 Å  |
| Cl $\cdots$ OCF                         | 3.83 Å  | 3.71 Å  | 3.69 Å  | Cl $\cdots$ OCA                         | 3.68 Å  | 3.83 Å  | 3.85 Å  |
| Cl $\cdots$ OF                          | 3.06 Å  | 2.99 Å  | 2.91 Å  | Cl $\cdots$ OA                          | 2.99 Å  | 3.07 Å  | 2.94 Å  |
| Cl $\cdots$ HOF                         | 2.07 Å  | 1.99 Å  | 1.88 Å  | Cl $\cdots$ HOA                         | 1.99 Å  | 2.09    | 1.93 Å  |
| $\Delta E$<br>(kcal·mol <sup>-1</sup> ) | -121.63 | -120.32 | -111.18 | $\Delta E$<br>(kcal·mol <sup>-1</sup> ) | -123.92 | -120.83 | -115.07 |

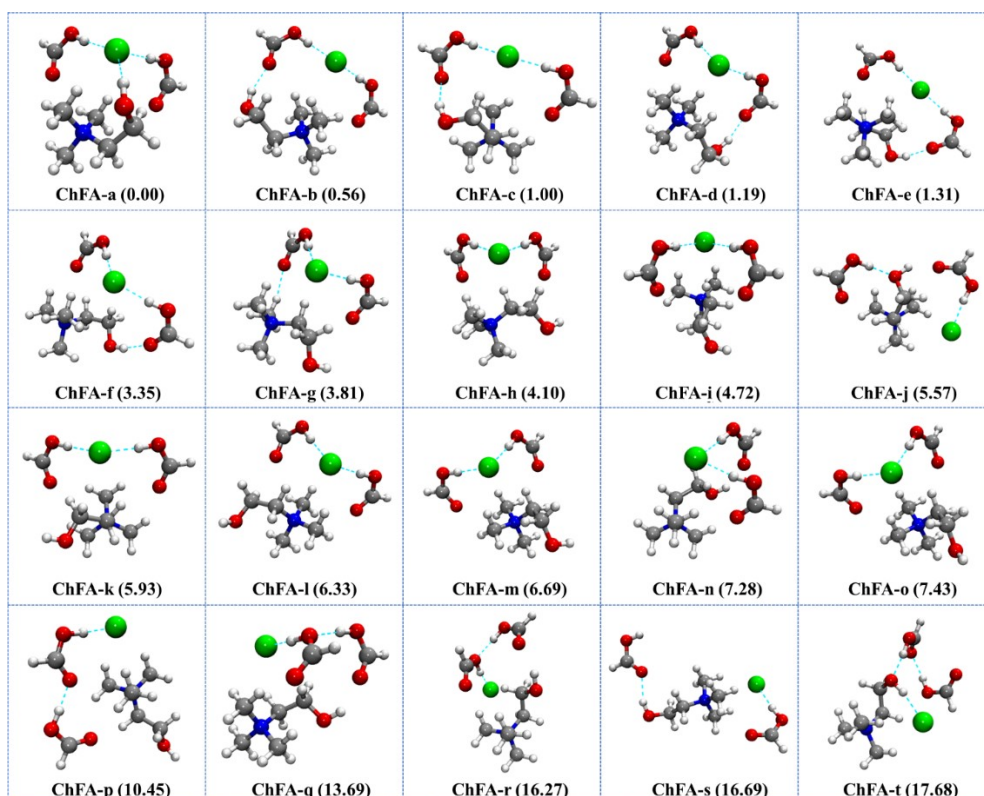

Fig 1S Typical optimized structures of ChFA (relative energy, kcal·mol<sup>-1</sup>) at  $\omega$ B97XD/6-311++G(d,p) basis level

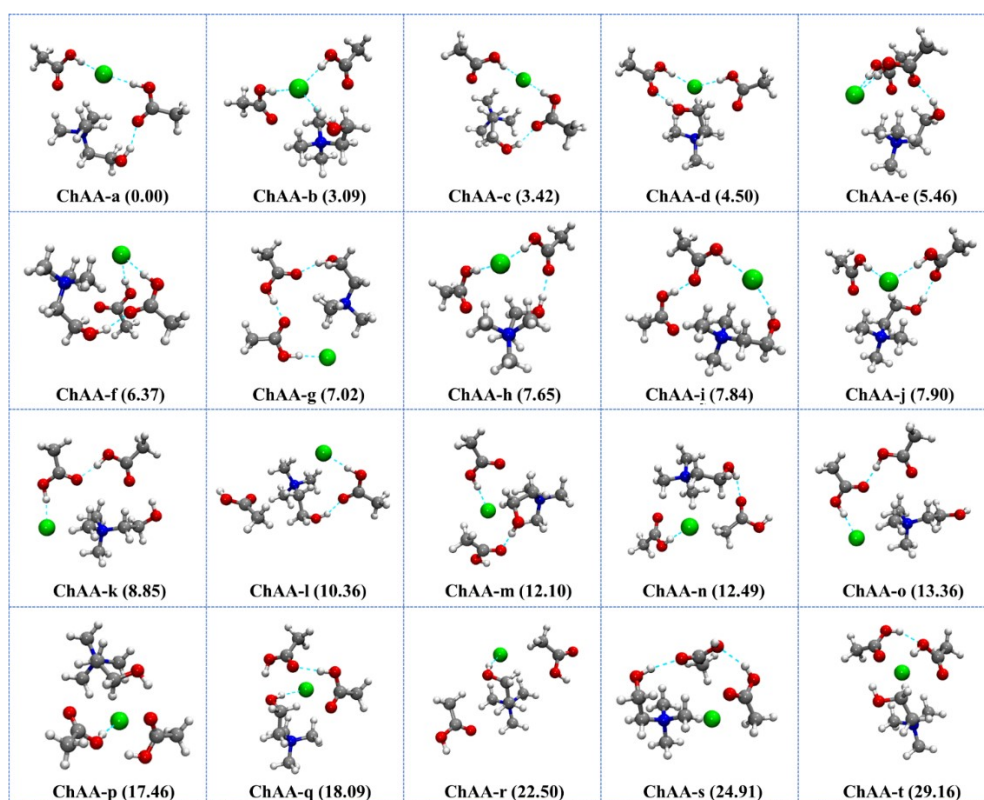

Fig 2S Typical optimized structures of ChAA (relative energy, kcal·mol<sup>-1</sup>) at  $\omega$ B97XD/6-311++G(d,p) basis level

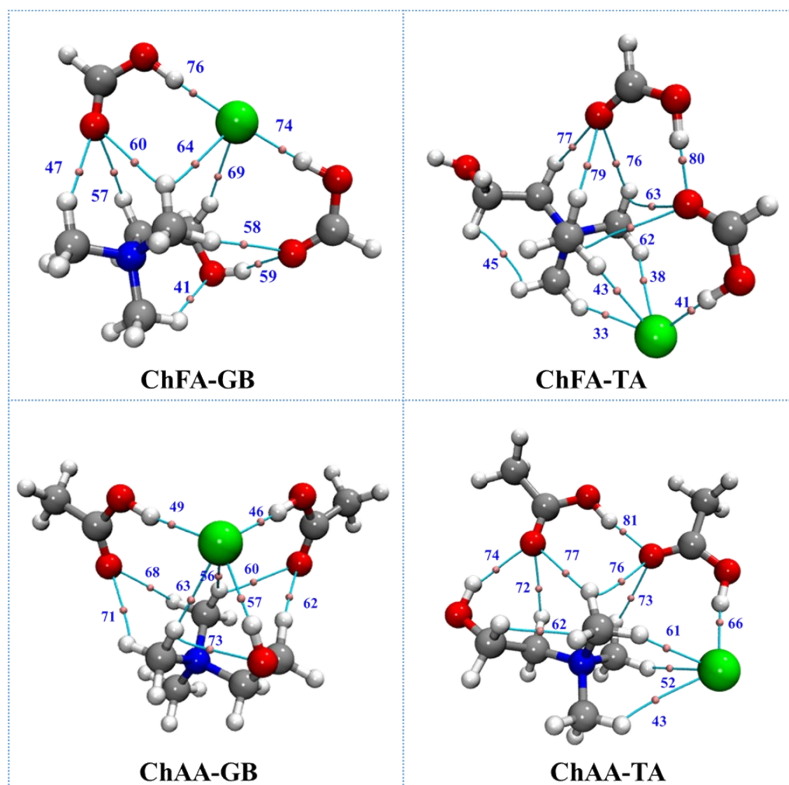

**Fig. 3S.** Bond paths and bond critical points (BCP) of ChFA-GB, ChFA-TA, ChAA-GB and ChAA-TA.

**Table S4** Analysis of the bond critical points in ChFA-GA (all values in a.u.)

| BCP | Hydrogen bond    | $\rho(r)$ | $\nabla^2\rho(r)$ | $\lambda_1$ | $\lambda_2$ | $\lambda_3$ |
|-----|------------------|-----------|-------------------|-------------|-------------|-------------|
| 47  | Cl $\cdots$ HOF  | 0.0320    | 0.0721            | -0.0415     | 0.1549      | -0.0413     |
| 66  | Cl $\cdots$ HOF  | 0.0331    | 0.0730            | -0.0433     | 0.1593      | -0.0431     |
| 57  | HMT $\cdots$ Cl  | 0.0124    | 0.0374            | 0.0578      | -0.0103     | -0.0101     |
| 58  | HMT $\cdots$ Cl  | 0.0126    | 0.0372            | -0.0103     | -0.0104     | 0.0579      |
| 67  | HOH $\cdots$ Cl  | 0.0226    | 0.0648            | 0.1144      | -0.0245     | -0.0252     |
| 72  | HCN $\cdots$ OCF | 0.0123    | 0.0395            | -0.0124     | -0.0118     | 0.0637      |
| 36  | HMT $\cdots$ OCF | 0.0111    | 0.0393            | 0.0590      | -0.0091     | -0.0106     |
| 37  | HMT $\cdots$ OCF | 0.0114    | 0.0404            | -0.0111     | 0.0612      | -0.0097     |
| 63  | HMT $\cdots$ OCF | 0.0091    | 0.0320            | -0.0076     | 0.0452      | -0.0056     |
| 60  | HMT $\cdots$ OH  | 0.0117    | 0.0416            | -0.0063     | 0.0576      | -0.0098     |

**Table S5** Analysis of the bond critical points in ChFA-GB (all values in a.u.)

| BCP | Hydrogen bond   | $\rho(r)$ | $\nabla^2\rho(r)$ | $\lambda_1$ | $\lambda_2$ | $\lambda_3$ |
|-----|-----------------|-----------|-------------------|-------------|-------------|-------------|
| 74  | Cl $\cdots$ HOF | 0.0184    | 0.0621            | -0.0190     | -0.0198     | 0.1008      |



|    |                  |        |        |         |         |         |
|----|------------------|--------|--------|---------|---------|---------|
| 76 | Cl $\cdots$ HOF  | 0.0380 | 0.0750 | 0.1790  | -0.0521 | -0.0518 |
| 64 | HMT $\cdots$ Cl  | 0.0115 | 0.0366 | -0.0081 | 0.0539  | -0.0092 |
| 69 | HCO $\cdots$ Cl  | 0.0130 | 0.0386 | -0.0113 | 0.0610  | -0.0111 |
| 57 | HCN $\cdots$ OCF | 0.0121 | 0.0420 | -0.0114 | 0.0651  | -0.0117 |
| 47 | HMT $\cdots$ OCF | 0.0153 | 0.0615 | -0.0156 | 0.0936  | -0.0164 |
| 60 | HMT $\cdots$ OCF | 0.0075 | 0.0244 | 0.0369  | -0.0060 | -0.0065 |
| 58 | HMT $\cdots$ OCF | 0.0107 | 0.0349 | 0.0555  | -0.0105 | -0.0101 |
| 59 | HOH $\cdots$ OCF | 0.0270 | 0.1133 | -0.0363 | -0.0375 | 0.1872  |
| 41 | HMT $\cdots$ OH  | 0.0184 | 0.0621 | -0.0190 | -0.0198 | 0.1008  |

**Table S6** Analysis of the bond critical points in ChFA-TA (all values in a.u.)

| BCP | Hydrogen bond    | $\rho(r)$ | $\nabla^2\rho(r)$ | $\lambda_1$ | $\lambda_2$ | $\lambda_3$ |
|-----|------------------|-----------|-------------------|-------------|-------------|-------------|
| 41  | Cl $\cdots$ HOF  | 0.0529    | 0.0640            | -0.0805     | 0.2246      | -0.0801     |
| 33  | HMT $\cdots$ Cl  | 0.0147    | 0.0443            | 0.0702      | -0.0129     | -0.0130     |
| 38  | HMT $\cdots$ Cl  | 0.0140    | 0.0415            | 0.0653      | -0.0121     | -0.0117     |
| 43  | HMT $\cdots$ Cl  | 0.0142    | 0.0421            | 0.0664      | -0.0123     | -0.0120     |
| 78  | HCN $\cdots$ OCF | 0.0116    | 0.0442            | -0.0106     | 0.0662      | -0.0114     |
| 76  | HMT $\cdots$ OCF | 0.0091    | 0.0282            | -0.0080     | 0.0440      | -0.0079     |
| 79  | HMT $\cdots$ OCF | 0.0119    | 0.0385            | -0.0116     | 0.0615      | -0.0114     |
| 63  | HMT $\cdots$ OCF | 0.0068    | 0.0255            | 0.0342      | -0.0031     | -0.0055     |
| 80  | HOF $\cdots$ OCF | 0.0518    | 0.1483            | -0.0955     | 0.3369      | -0.0931     |

**Table S7** Analysis of the bond critical points in ChAA-GA (all values in a.u.)

| BCP | Hydrogen bond    | $\rho(r)$ | $\nabla^2\rho(r)$ | $\lambda_1$ | $\lambda_2$ | $\lambda_3$ |
|-----|------------------|-----------|-------------------|-------------|-------------|-------------|
| 43  | Cl $\cdots$ HOA  | 0.0417    | 0.0734            | 0.1910      | -0.0590     | -0.0586     |
| 47  | Cl $\cdots$ HOA  | 0.0364    | 0.0748            | 0.1730      | -0.0493     | -0.0490     |
| 52  | HMT $\cdots$ Cl  | 0.0108    | 0.0343            | -0.0074     | 0.0502      | -0.0085     |
| 55  | HMT $\cdots$ Cl  | 0.0084    | 0.0264            | -0.0043     | 0.0366      | -0.0058     |
| 71  | HMT $\cdots$ OCA | 0.0128    | 0.0423            | 0.0675      | -0.0125     | -0.0127     |
| 79  | HMT $\cdots$ OCA | 0.0151    | 0.0610            | -0.0154     | 0.0923      | -0.0159     |
| 57  | HMT $\cdots$ OCA | 0.0122    | 0.0399            | 0.0637      | -0.0121     | -0.0117     |
| 54  | HMT $\cdots$ OCA | 0.0107    | 0.0359            | -0.0095     | 0.0556      | -0.0101     |
| 58  | HOH $\cdots$ OCA | 0.0328    | 0.1275            | -0.0468     | 0.2234      | -0.0490     |
| 69  | HMT $\cdots$ OH  | 0.0106    | 0.0370            | 0.0522      | -0.0063     | -0.0089     |

**Table S8** Analysis of the bond critical points in ChAA-GB (all values in a.u.)

| BCP | Hydrogen bond   | $\rho(r)$ | $\nabla^2\rho(r)$ | $\lambda_1$ | $\lambda_2$ | $\lambda_3$ |
|-----|-----------------|-----------|-------------------|-------------|-------------|-------------|
| 46  | Cl $\cdots$ HOA | 0.0318    | 0.0726            | 0.1543      | -0.0410     | -0.0408     |

|    |           |        |        |         |         |         |
|----|-----------|--------|--------|---------|---------|---------|
| 49 | Cl...HOA  | 0.0301 | 0.0712 | 0.1476  | -0.0383 | -0.0381 |
| 57 | HOH...Cl  | 0.0232 | 0.0656 | -0.0253 | 0.1168  | -0.0260 |
| 56 | HMT...Cl  | 0.0127 | 0.0376 | -0.0105 | -0.0105 | 0.0586  |
| 63 | HMT...Cl  | 0.0131 | 0.0395 | -0.0111 | 0.0615  | -0.0109 |
| 60 | HMT...OCA | 0.0096 | 0.0339 | 0.0481  | -0.0082 | -0.0061 |
| 68 | HMT...OCA | 0.0121 | 0.0429 | 0.0653  | -0.0119 | -0.0104 |
| 71 | HMT...OCA | 0.0117 | 0.0418 | -0.0098 | 0.0629  | -0.0113 |
| 62 | HCO...OCA | 0.0130 | 0.0422 | -0.0126 | 0.0682  | -0.0133 |

**Table S9** Analysis of the bond critical points in ChAA-TA (all values in a.u.)

| BCP | Hydrogen bond | $\rho(r)$ | $\nabla^2\rho(r)$ | $\lambda_1$ | $\lambda_2$ | $\lambda_3$ |
|-----|---------------|-----------|-------------------|-------------|-------------|-------------|
| 66  | Cl...HOA      | 0.0469    | 0.0664            | -0.0685     | 0.2030      | -0.0681     |
| 43  | HMT...Cl      | 0.0067    | 0.0181            | 0.0256      | -0.0036     | -0.0039     |
| 52  | HMT...Cl      | 0.0180    | 0.0543            | 0.0880      | -0.0170     | -0.0167     |
| 61  | HMT...Cl      | 0.0183    | 0.0545            | 0.0893      | -0.0173     | -0.0176     |
| 73  | HMT...OCA     | 0.0109    | 0.0364            | -0.0105     | 0.0563      | -0.0094     |
| 76  | HMT...OCA     | -0.0105   | 0.0386            | -0.0068     | 0.0549      | -0.0095     |
| 77  | HMT...OCA     | 0.0099    | 0.0304            | 0.0485      | -0.0089     | -0.0092     |
| 72  | HCN...OCA     | 0.0141    | 0.0527            | -0.0136     | 0.0796      | -0.0133     |
| 74  | HOH...OCA     | 0.0186    | 0.0707            | -0.0217     | 0.1145      | -0.0221     |
| 81  | HOA...OCA     | 0.0490    | 0.1427            | 0.3164      | -0.0881     | -0.0856     |

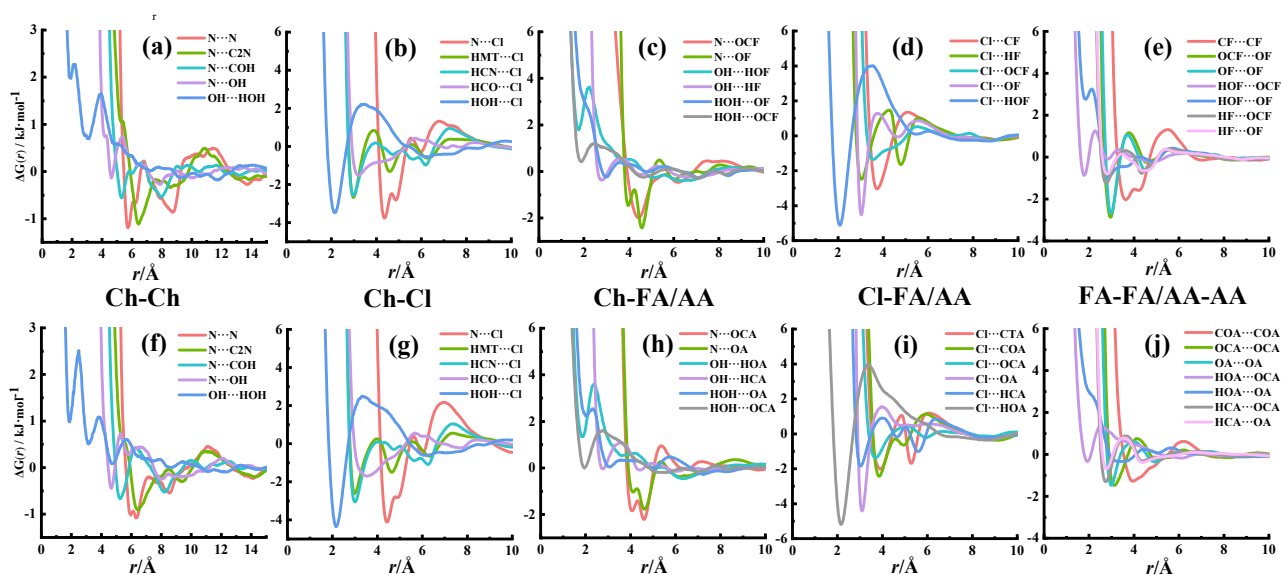

**Fig. 4S** The potentials of mean force of ChClFA (top panel) and ChClAA (bottom panel).

1. N. Norman, *Acta Cryst*, 1957, **10**, 370-373.

2. J. Krogh-Moe, *Acta Cryst*, 1956, **9**, 951-953.
3. R. Kaplow, S. L. Strong and B. L. J. P. R. Averbach, *American Physical Society*, 1965, **138**, A1336-A1345.
4. G. Johanson and M. Sandström, *Chemica. Scripta.*, 1973, **4**, 195-198.
5. S. J. L. Billinge and M. F. Thorpe, 2002.
6. A. K. Soper, *Chem. Phys.*, 1996, **202**, 295-306.
7. A. K. Soper, *Phys. Rev. B*, 2005, **72**, 104204.
8. O. S. Hammond, D. T. Bowron and K. J. Edler, *Green. Chem.*, 2016, **18**, 2736-2744.
9. S. Fathi, M. A. Gonzalez, M. Bahri, S. Nasr and M.-C. Bellissent-Funel, *J. Mol. Liq.*, 2015, **207**, 125-135.
10. D. Lengvinaitė, K. Aidas and L. Kimtys, *Phys. Chem. Chem. Phys.*, 2019, **21**, 14811-14820.
